# Supplementary material for: First principles prediction of two-dimensional Janus XMoGeN2 (X = S, Se and Te) materials
Source: Royal Society of Chemistry journal article supplement (doi:10.1039/d2dt02222b), 2022-01-01
Supplement: d2dt02222b1.pdf [file d2dt02222b1.pdf]

Supporting Information (SI)

**First principles prediction of two-dimensional Janus**

**XMoGeN<sub>2</sub> (X = S, Se and Te) materials**

Son-Tung Nguyen<sup>1</sup>, Pham V. Cuong<sup>1</sup>, Cuong Q. Nguyen<sup>2,3,†</sup>, Chuong V. Nguyen<sup>4,†</sup>

<sup>1</sup>*Faculty of Electrical Engineering Technology, Hanoi University of Industry, Hanoi 100000, Vietnam*

<sup>2</sup>*Institute of Research and Development, Duy Tan University, Da Nang 550000, Vietnam.*

<sup>3</sup>*Faculty of Natural Sciences, Duy Tan University, Da Nang 550000, Vietnam*

<sup>4</sup>*Department of Materials Science and Engineering,*

*Le Quy Don Technical University, Ha Noi 100000, Vietnam*

<sup>†</sup>*Corresponding authors: [chuong.vnguyen@lqdtu.edu.vn](mailto:chuong.vnguyen@lqdtu.edu.vn) and [nguyenquangcuong3@duytan.edu.vn](mailto:nguyenquangcuong3@duytan.edu.vn)*

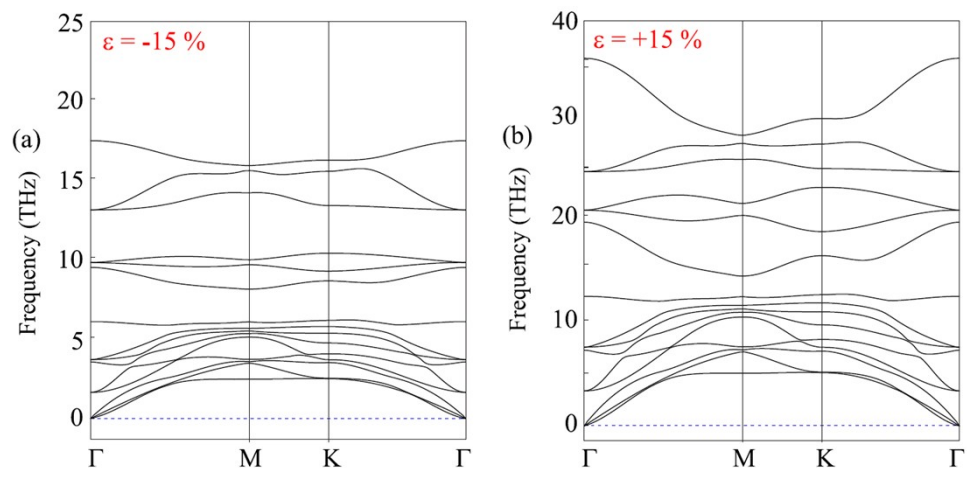

Fig. S1. Phonon spectrum of TeMoGeN2 monolayer under strain of (a) -15 % and (b) +15 %.

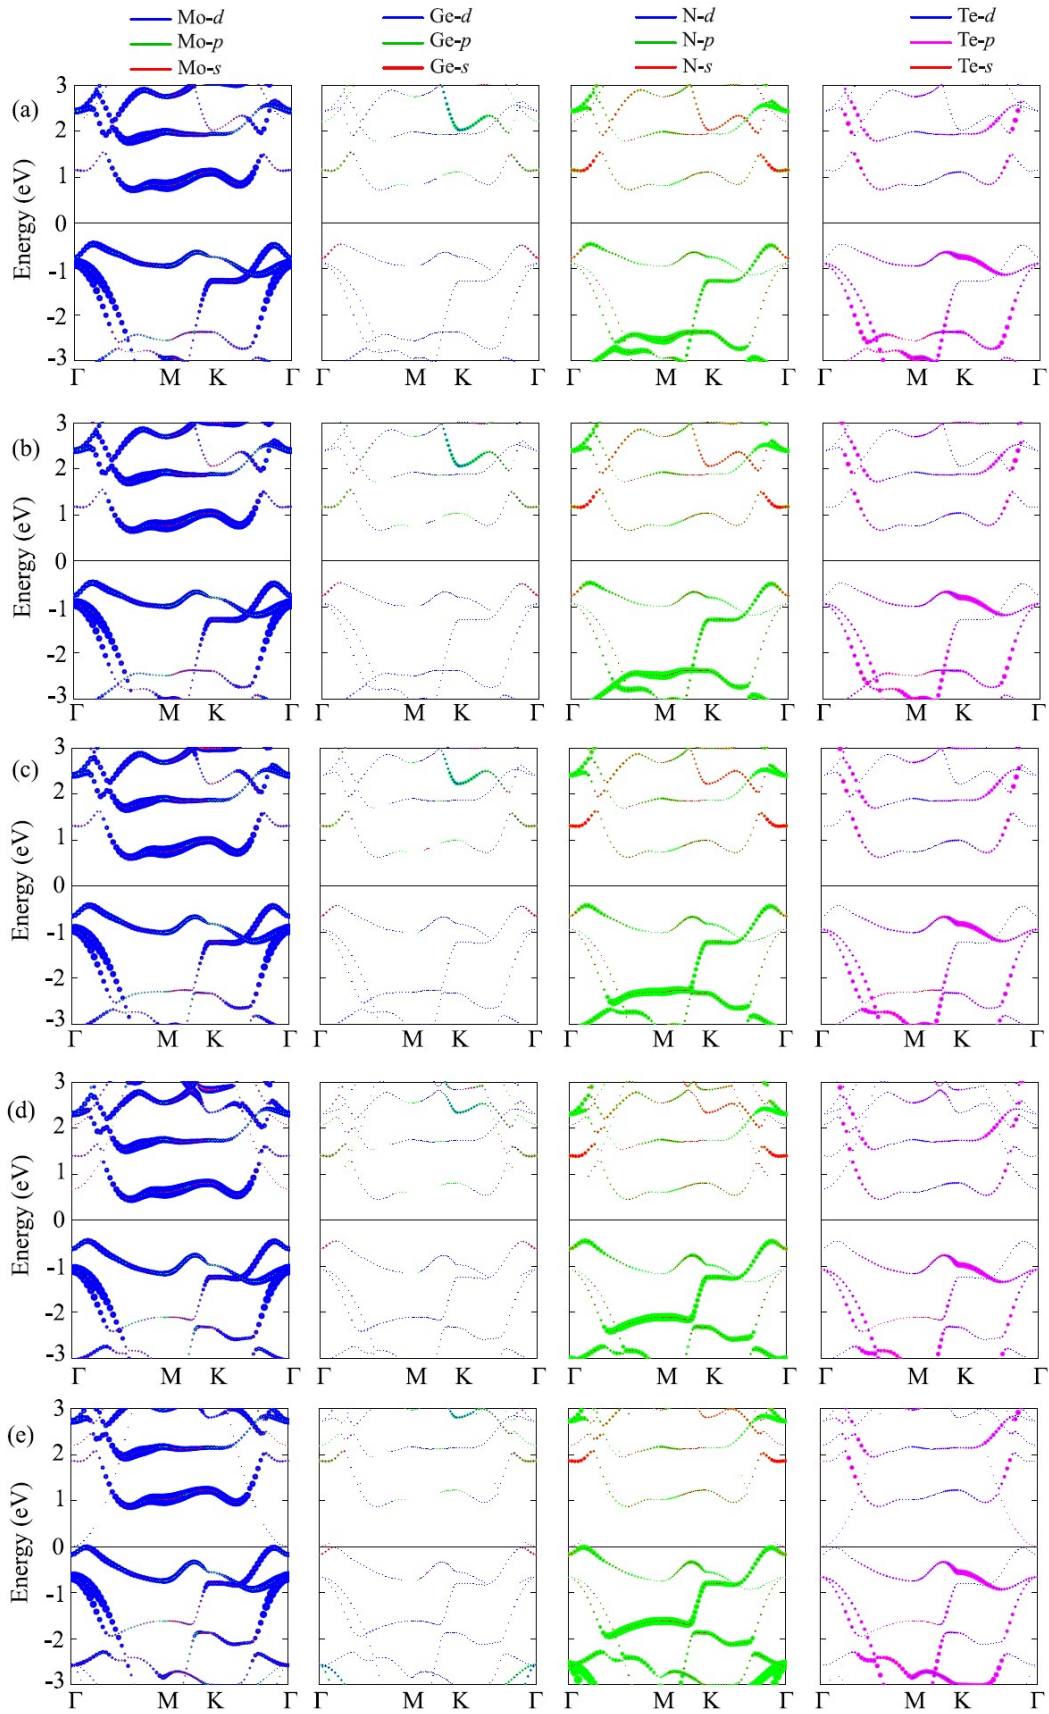

Fig. S2. Orbital projected band structures for TeMoGeN<sub>2</sub> monolayer under different strengths of electric field of (a)  $E = -1.0$  V/nm, (b)  $E = -0.7$  V/nm, (c)  $E = 0$  V/nm, (d)  $E = +0.7$  V/nm and (e)  $E = +1.0$  V/nm.

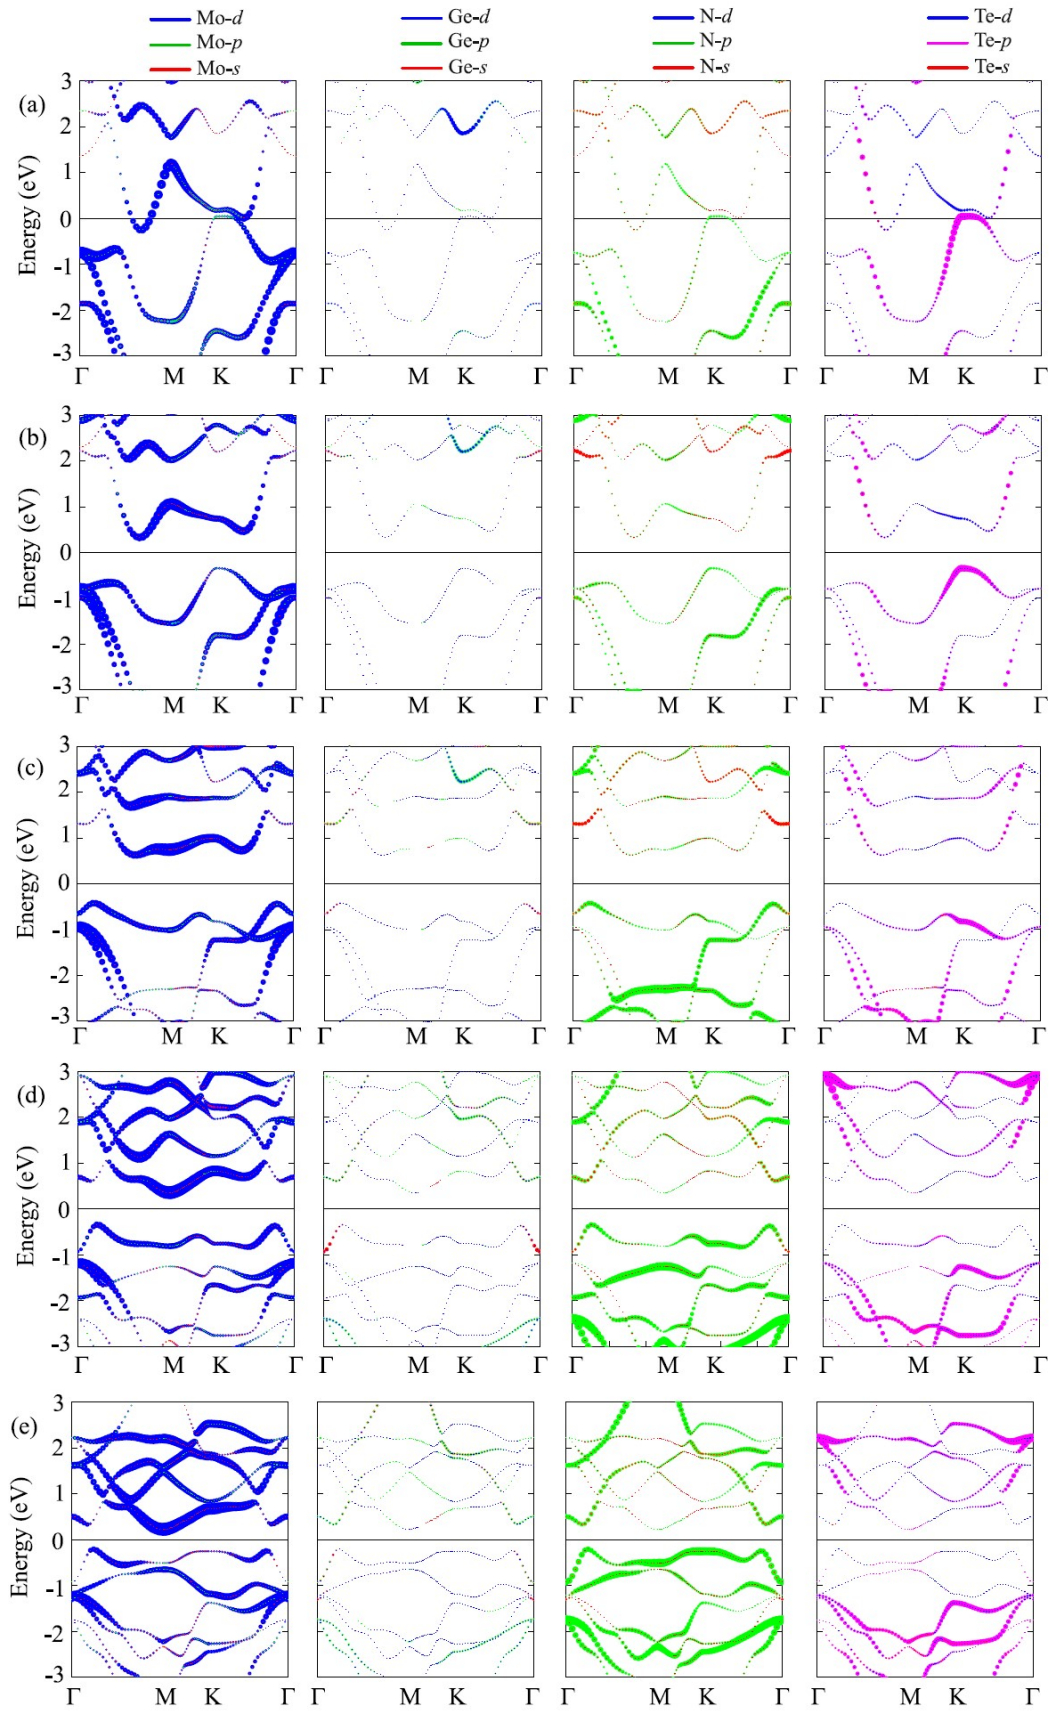

Fig. S3. Orbital projected band structures for TeMoGeN<sub>2</sub> monolayer under different strengths of electric field of different strains of (a)  $\epsilon = -15\%$ , (b)  $\epsilon = -8\%$ , (c)  $\epsilon = 0\%$ , (d)  $\epsilon = +8\%$ , and (e)  $\epsilon = +15\%$ .
